# Supplementary material for: Comparing Detection Schemes for Adversarial Images against Deep Learning Models for Cancer Imaging
Source: MDPI journal article supplement (doi:10.3390/cancers15051548), 2023-03-01
Supplement: s1 [file s1]

## Supplement

### *Classification Model Architecture*

**Table S1.** Model parameters of VGG16 model used for classification

| Layer (type)               | Output Shape          | Param #   |
|----------------------------|-----------------------|-----------|
| input_1 (Input Layer)      | (None, 224, 224, 3)   | 0         |
| block1_conv1 (Conv2D)      | (None, 224, 224, 64)  | 1792      |
| block1_conv2 (Conv2D)      | (None, 224, 224, 64)  | 36928     |
| block1_pool (MaxPooling2D) | (None, 112, 112, 64)  | 0         |
| block2_conv1 (Conv2D)      | (None, 112, 112, 128) | 73856     |
| block2_conv2 (Conv2D)      | (None, 112, 112, 128) | 147584    |
| block2_pool (MaxPooling2D) | (None, 56, 56, 128)   | 0         |
| block3_conv1 (Conv2D)      | (None, 56, 56, 256)   | 295168    |
| block3_conv2 (Conv2D)      | (None, 56, 56, 256)   | 590080    |
| block3_conv3 (Conv2D)      | (None, 56, 56, 256)   | 590080    |
| block3_pool (MaxPooling2D) | (None, 28, 28, 256)   | 0         |
| block4_conv1 (Conv2D)      | (None, 28, 28, 512)   | 1180160   |
| block4_conv2 (Conv2D)      | (None, 28, 28, 512)   | 2359808   |
| block4_conv3 (Conv2D)      | (None, 28, 28, 512)   | 2359808   |
| block4_pool (MaxPooling2D) | (None, 14, 14, 512)   | 0         |
| block5_conv1 (Conv2D)      | (None, 14, 14, 512)   | 2359808   |
| block5_conv2 (Conv2D)      | (None, 14, 14, 512)   | 2359808   |
| block5_conv3 (Conv2D)      | (None, 14, 14, 512)   | 2359808   |
| block5_pool (MaxPooling2D) | (None, 7, 7, 512)     | 0         |
| dropout (Dropout)          | (None, 7, 7, 512)     | 0         |
| flatten (Flatten)          | (None, 25088)         | 0         |
| fc1 (Dense)                | (None, 4096)          | 102764544 |
| dropout_1 (Dropout)        | (None, 4096)          | 0         |

|                           |              |         |
|---------------------------|--------------|---------|
| fc2 (Dense)               | (None, 1024) | 4195328 |
| predictions (Dense)       | (None, 2)    | 2050    |
| Total params: 121,676,610 |              |         |

*Classification Model Training Parameters*

**Table S2.** Training parameters for VGG16 classification models for all datasets

| Parameters            | CNN-1<br>(CT)        | CNN-2<br>(Mammogram) | CNN-3<br>(MRI)       | CNN-4<br>(MNIST)          | CNN-5<br>(CIFAR-10)       |
|-----------------------|----------------------|----------------------|----------------------|---------------------------|---------------------------|
| Input Image Size      | 224 x 224            | 116 x 116            | 224 x 224            | 32 x 32                   | 32 x 32                   |
| Batch Size            | 50                   | 50                   | 50                   | 64                        | 128                       |
| Max Epochs            | 200                  | 100                  | 100                  | 20                        | 60                        |
| Patience              | 50                   | 20                   | 5                    | 0                         | 10                        |
| Initial Learning Rate | 2e-4                 | 2e-4                 | 2e-4                 | 0.01                      | 0.001                     |
| Learning rate decay   | 1e-6                 | 1e-6                 | 1e-6                 | 0                         | 1e-5                      |
| Momentum              | 0.9                  | 0.9                  | 0.9                  | 0                         | 0.9                       |
| Loss                  | Binary cross-entropy | Binary cross-entropy | Binary cross-entropy | Categorical cross-entropy | Categorical cross-entropy |
| Optimizer             | SGD                  | SGD                  | SGD                  | SGD                       | SGD                       |

### *Detection Model Architecture*

For the ResNet detection model, we used an ImageNet pretrained ResNet50 as the base network, followed by a global average pooling layer, a dropout layer of rate 0.5, a dense layer of 100 neurons, another dropout layer of rate 0.5, and a 2-neuron dense layer for classification.

**Table S3. Model Parameters of ResNet model used for detection**

| Layer (type)                 | Output Shape       | Param #  |
|------------------------------|--------------------|----------|
| resnet50 (Model)             | (None, 4, 4, 2048) | 23587712 |
| global_average_pooling2d_1   | (None, 2048) 0     |          |
| dropout_2 (Dropout)          | (None, 2048)       | 0        |
| dense_3 (Dense)              | (None, 100)        | 204900   |
| dropout_3 (Dropout)          | (None, 100)        | 0        |
| dense_4 (Dense)              | (None, 2)          | 202      |
| Total params: 23,792,814     |                    |          |
| Trainable params: 23,739,694 |                    |          |
| Non-trainable params: 53,120 |                    |          |

For the DenseNet model, we used an ImageNet pretrained DenseNet121 as the base network, followed by a global average pooling layer, batch normalization layer, dropout layer of rate 0.5, a dense layer of 1024 neurons, a dense layer of 512 layers, a batch normalization layer, a dropout layer of 0.5, and a 2-neuron dense layer for classification.

**Table S4. Model Parameters of DenseNet model used for detection**

| Layer (type)                 | Output Shape       | Param # |
|------------------------------|--------------------|---------|
| DenseNet121 (Model)          | (None, 3, 3, 1024) | 7037504 |
| global_average_pooling2d_2   | (None, 1024)       | 0       |
| batch_normalization_2        | (None, 1024)       | 4096    |
| dropout_4 (Dropout)          | (None, 1024)       | 0       |
| dense_5 (Dense)              | (None, 1024)       | 1049600 |
| dense_6 (Dense)              | (None, 512)        | 524800  |
| batch_normalization_3        | (None, 512)        | 2048    |
| dropout_5 (Dropout)          | (None, 512)        | 0       |
| dense_7 (Dense)              | (None, 2)          | 1026    |
| Total params: 8,619,074      |                    |         |
| Trainable params: 8,532,354  |                    |         |
| Non-trainable params: 86,720 |                    |         |

For the other three detection models, we first used an ImageNet pretrained DenseNet-121 model to extract deep features from images and separately used support vector machine (SVM), random forest (RF), and logistic regression (LR) as the detection classifiers based on the extracted deep features.

**Table S5. Model Training Parameters for Detection Models**

|                  |                      |                      |
|------------------|----------------------|----------------------|
| Input Image Size | CT                   | [116, 116, 3]        |
|                  | Mammogram            | [116, 116, 3]        |
|                  | MRI                  | [224, 224, 3]        |
|                  |                      |                      |
| Model            | ResNet               | DenseNet             |
| Batch Size       | 64                   | 64                   |
| Max Epochs       | 30                   | 30                   |
| Learning Rate    | 1 e-6                | 1 e-7                |
| Loss             | Binary cross-entropy | Binary cross-entropy |
| Optimizer        | SGD                  | SGD                  |

## Adversarial Attack Methods

**Table S6.** Equations and parameters for FGSM, PGD, and BIM attack methods. The number of perturbation steps for BIM and PGD are both set to 10, and the step sizes are set to  $\varepsilon/10$  and  $\varepsilon/4$  for BIM and PGD, respectively.

| Attack Type                      | Equation                                                                                             | Parameters                                                                                                                                                                                                                                                                                                                                                                                               |
|----------------------------------|------------------------------------------------------------------------------------------------------|----------------------------------------------------------------------------------------------------------------------------------------------------------------------------------------------------------------------------------------------------------------------------------------------------------------------------------------------------------------------------------------------------------|
| Fast Gradient Sign Method (FGSM) | $x_{adv} = x + \varepsilon \text{sign}(\nabla_x J(x, y))$                                            | $x_{adv}$ = adversarial image<br>$x$ = clean input image<br>$\varepsilon$ = perturbation size<br>$J$ = loss function<br>$y$ = target label                                                                                                                                                                                                                                                               |
| Projected Gradient Descent (PGD) | $x^0 = x,$ $x^t = \text{Clip}_{x, \varepsilon} \{x^{t-1} + \alpha \text{sign}(\nabla_x J(x^t, y))\}$ | $x^0$ = clean input image<br>$x^i$ = adversarial image at $i^{\text{th}}$ step<br>$\varepsilon$ = maximum perturbation size<br>$\alpha$ = perturbation step size<br>$J$ = loss function<br>$y$ = target label<br>$\text{Clip}\{\}$ function limits updated adversarial sample to within range of $\varepsilon$ ball ( $[x-\varepsilon, x+\varepsilon]$ ) and the input space ( $[0,1]$ for pixel values) |
| Basic Iterative Method (BIM)     | $x^0 = x,$ $x^t = \Pi_{\varepsilon}(x^{t-1} + \alpha \text{sign}(\nabla_x J(x^t, y)))$               | $x^0$ = clean input image<br>$x^i$ = adversarial image at $i^{\text{th}}$ step<br>$\varepsilon$ = maximum perturbation size<br>$\alpha$ = perturbation step size<br>$J$ = loss function<br>$y$ = target label<br>$y$ = target label<br>$\Pi\{\}$ function projects the adversarial example back onto the $\varepsilon$ ball ( $[x-\varepsilon, x+\varepsilon]$ )                                         |
